# Supplementary material
Source: PubMed Central journal article supplement (PMC3251045)

# Supporting Information

Kopera et al. 10.1073/pnas.1100275108

## SI Materials and Methods

**Cultured Cell Retrotransposition Assay.** The cultured cell retrotransposition assay was previously described (1). Briefly, HeLa cells were plated at  $2 \times 10^3$ ,  $2 \times 10^4$ , and  $2 \times 10^5$  cells per well in a six-well dish (BD Falcon). The next day cells were transfected with 1.0  $\mu$ g of plasmid DNA with or without 0.5  $\mu$ g of hr-GFP plasmid, using Eugene6 (Roche) and OptiMEM (Invitrogen) according to the manufacturer's instructions. The next day, medium was replenished. Two days after transfection cells co-transfected with hr-GFP were analyzed by flow cytometry to determine transfection efficiency. Three days (G418) or 5 d (blasticidin) after transfection, retrotransposition events were selected for using the appropriate drug in cell maintenance media: 400  $\mu$ g/mL G418 for cells transfected with pJM102/L1.3 and pAJ101/L1.3 plasmid constructs and 10  $\mu$ g/mL blasticidin for cells transfected with pJJ101/L1.3 and pJB101/L1.3 constructs. Drug-containing media were changed until 12 d after transfection; then cells were washed, fixed, and stained with crystal violet for 30 min at room temperature. Stained cells were rinsed, dried, counted, and scanned. Retrotransposition assays shown are representative of experiments repeated at least three times.

For retrotransposition assays in CHO cells, cells were plated at  $2 \times 10^4$  and  $2 \times 10^5$  cells per well in six-well plates or  $2 \times 10^5$  and  $2 \times 10^6$  in T75 flasks (BD Falcon). Cells were transfected 6–8 h after plating. Transfection efficiencies, drug selection, staining, and counting were performed as stated above.

**Telomere-L1 Southern Blot Analysis.** CHO cells were transfected for the cultured cell retrotransposition assay as previously described (2). Twelve to fourteen days after transfection, drug-resistant colonies harboring retrotransposition events were isolated and expanded. Genomic DNA was isolated from each clonal cell line and subjected to PCR using a telomere oligonucleotide primer (Telo3T: 5'-GGTTAGGGTTAGGGTTAGGGTTT-3'; Telo2T: 5'-GGTTAGGGTTAGGGTTAGGGTT-3'; or Telo: 5'-GGTTAGGGTTAGGGTTAGGG-3') and an engineered-L1 specific primer (J-L1-end186: 5'-AAGTATAATAAAGACGTCAGGGTTC-3') (3). PCR products were run on a 2% agarose 1X Tris-Acetate-EDTA gel and transferred onto 0.45- $\mu$ m nylon membrane (GE-Amersham Hybond-XL) overnight. An oligonucleotide probe specific to the transfected long interspersed element-1 (L1) (J-L1-probe: 5'-TGTGATGCTATTGCTTTATTTGTA-3'; or CEP2as: 5'-CTGCATTCTAGTTGTGGTTTGTCC-3') was phosphorylated with dATP- $\gamma$ P<sup>32</sup> (MP Biomedicals) using T4-poly-nucleotide kinase (New England Biolabs) at 37 °C for 30 min. All blot incubations and washes were done at 42 °C. Blots were first incubated for 30 min in prehybridization buffer (6 $\times$  SSC, 5 $\times$  Denhardt's solution, and 0.1% SDS), then incubated for 30 min in hybridization buffer (6 $\times$  SSC and 0.1% SDS) and finally incubated with the labeled probe overnight in hybridization buffer. Blots were washed three times for 30 min with hybridization buffer, were exposed to film, and positive bands were identified. PCR products that gave a positive Southern blot signal were ligated into pCR-Blunt (Invitrogen) or pGEM-T-easy (Promega) vector and sequenced at the University of Michigan DNA Sequencing Core.

**L1 Element Amplification Protocol (LEAP) Assay.** The LEAP assay was previously described (4). Briefly, HeLa cells were plated at

$6 \times 10^6$  in T175 flasks (BD Falcon) and transfected with 30  $\mu$ g L1.3 plasmid using Eugene6 (Roche) the next day. Selection with 225  $\mu$ g/mL hygromycin B began 72 h posttransfection, changing medium daily. Nine days after transfection, cells were lysed [1.5 mM KCl, 2.5 mM MgCl<sub>2</sub>, 5 mM Tris-Cl (pH 7.5), 1% deoxycholic acid, 1% Triton X-100, and 1 $\times$  protease inhibitor EDTA-free mixture (Roche)] and subjected to sucrose cushion (8.5% and 17% sucrose) ultracentrifugation for 2 h at 178,000  $\times$  g for ribonucleoprotein particle (RNP) isolation. RNP pellets were resuspended in 1 $\times$  protease inhibitor EDTA-free mixture (Roche), and protein concentration was determined by the Bradford reagent assay (BioRad). One microgram of L1-RNP was incubated with buffer [50 mM Tris-Cl (pH 7.5), 50 mM KCl, 5 mM MgCl<sub>2</sub>, 10 mM DTT, 20 U RNasin (Promega), and 0.05% Tween-20], an HPLC-purified oligonucleotide adapter (0.4  $\mu$ M), and dNTPs (0.2 mM) for the reverse transcription reaction at 37 °C for 1 h. The cDNAs were amplified by PCR, using primers specific for the transfected L1 (sense: 5'-GGGTTCGAAATCGATAAGCTTGGATCCAGA-3') and the adapter (RACE: 5'-GCGAGCACAGAATTAATACGACT-3'). The PCR products were analyzed on a 2% agarose gel in 1 $\times$  TAE. Bands were gel purified (Qiagen), ligated to the pCR-Blunt (Invitrogen) or pGEM-T-easy (Promega) vector, and sequenced. In LEAP assays in which bands are faint or difficult to visualize, gel slices were excised at the expected LEAP product size, and DNA was gel purified and pooled from independent reactions before cloning for sequencing. LEAP gels shown are representative data of experiments repeated a minimum of three times from at least two independent L1-RNP preparations. Sequences of adapters used are as follows:

T12: 5'-GCGAGCACAGAATTAATACGACTCACTATAGG-T<sub>12</sub>-3'  
T12+VN: 5'-GCGAGCACAGAATTAATACGACTCACTATAGG-T<sub>12</sub>VN-3'  
T4spacerP: 5'-GCGAGCACAGAATTAATACGACTCACTATAGG-T<sub>4</sub>-(C<sub>3</sub>H<sub>6</sub>)(PO<sub>4</sub>)-3'  
T4AAC: 5'-GCGAGCACAGAATTAATACGACTCACTATAGG-TTTTAAC-3'  
T4AAddC: 5'-GCGAGCACAGAATTAATACGACTCACTATAGG-TTTTAAddC-3'  
Telo3: 5'-GCGAGCACAGAATTAATACGACTCACTATAGG-(TTAGGG)<sub>3</sub>-3'  
Telo3+TT: 5'-GCGAGCACAGAATTAATACGACTCACTATAGG-(TTAGGG)<sub>3</sub>TT-3'  
Telo2+TTAG: 5'-GCGAGCACAGAATTAATACGACTCACTATAGG-(TTAGGG)<sub>2</sub>TTAG-3'  
Telo2+TTAGG: 5'-GCGAGCACAGAATTAATACGACTCACTATAGG-(TTAGGG)<sub>2</sub>TTAGG-3'  
Telo3+T: 5'-GCGAGCACAGAATTAATACGACTCACTATAGG-(TTAGGG)<sub>3</sub>T-3'  
Telo3+TTA: 5'-GCGAGCACAGAATTAATACGACTCACTATAGG-(TTAGGG)<sub>3</sub>TTA-3'

RNAs were isolated from RNP samples (RNeasy, Qiagen). L1 RNA and/or GAPDH RNA were reverse-transcribed by Moloney murine leukemia virus-RT (Promega) using the LEAP adapters stated. MMLV-RT-PCR products were visualized, cloned, and sequenced as stated above for LEAP.



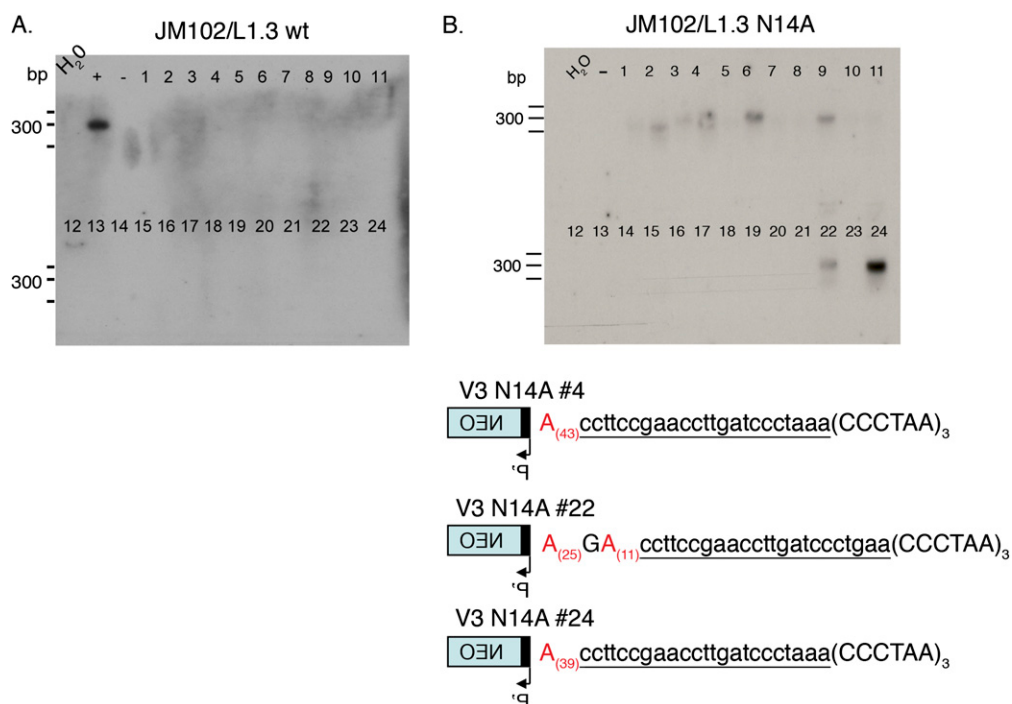

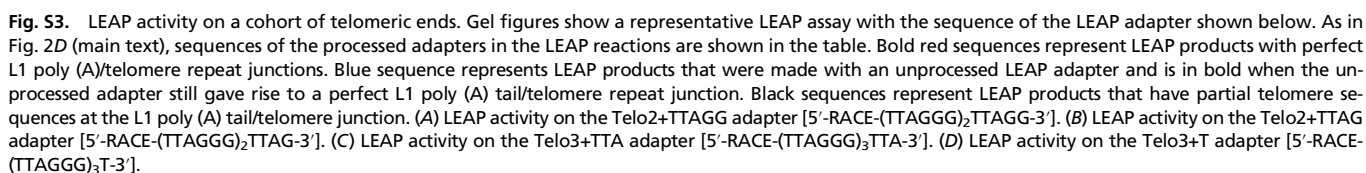

Supplement: 1100275108_pnas.201100275SI.pdf [file 1100275108_pnas.201100275SI.pdf]
